# Supplementary material for: Epidemiological Trends of Bloodstream Infections and Risk Factors for MDRO Bloodstream Infections in Critically Ill Patients: An Eight-Year Single-Center Data Analysis
Source: Research Square preprint supplement (doi:10.21203/rs.3.rs-7445271/v1), 2025-09-08
Supplement: Supplementary file 1 [file 5c464f5c392b8a8ee3125338.docx]

**Supplementary material**

| **Table S1. Pathogen Combinations in Polymicrobial Bloodstream Infections (2013-2020)** | | | |
| --- | --- | --- | --- |
| Year | Patient | Microorganism 1 | Microorganism 2 |
| 2013 | 1 | Acinetobacter baumannii | Staphylococcus aureus |
| 2013 | 2 | Acinetobacter baumannii | Enterococcus faecalis |
| 2014 | 3 | Enterobacter cloacae | Staphylococcus epidermidis |
| 2014 | 4 | Escherichia coli | other Pseudomonas species |
| 2015 | 5 | Streptococcus hemolyticus | Acinetobacter baumannii |
| 2015 | 6 | Escherichia coli | Burkholderia pseudomallei |
| 2015 | 7 | Cryptococcus neoformans | Candida parapsilosis |
| 2015 | 8 | Staphylococcus aureus | Coagulase-negative Staphylococcus |
| 2016 | 9 | Enterococcus faecium (Group D) | Streptococcus hemolyticus |
| 2016 | 10 | Indole-positive Proteus vulgaris | Staphylococcus epidermidis |
| 2016 | 11 | Enterococcus faecium (Group D) | Escherichia coli |
| 2016 | 12 | Enterococcus faecium (Group D) | Staphylococcus aureus |
| 2017 | 13 | Acinetobacter baumannii | Candida albicans |
| 2017 | 14 | Acinetobacter baumannii | Pseudomonas aeruginosa |
| 2018 | 15 | Acinetobacter baumannii | Enterococcus faecium (Group D) |
| 2018 | 16 | Staphylococcus epidermidis | Enterococcus faecium (Group D) |
| 2018 | 17 | Escherichia coli | Streptococcus agalactiae (Group B) |
| 2018 | 18 | Enterococcus faecium (Group D) | Staphylococcus aureus |
| 2018 | 19 | Candida albicans | Klebsiella pneumoniae subspecies pneumoniae |
| 2018 | 20 | Acinetobacter baumannii | Enterococcus faecium (Group D) |
| 2018 | 21 | Maltophilia Xenophilus | Klebsiella pneumoniae subspecies pneumoniae |
| 2019 | 22 | Serratia marcescens | Enterococcus faecium |
| 2019 | 23 | Enterococcus faecalis | Pseudomonas aeruginosa |
| 2019 | 24 | Candida albicans | Acinetobacter baumannii complex |
| 2019 | 25 | Staphylococcus humanus | Streptococcus constellatus |
| 2019 | 26 | Acinetobacter baumannii | Enterococcus faecium |
| 2020 | 27 | Klebsiella pneumoniae | Escherichia coli |
| 2020 | 28 | Escherichia coli | Pseudomonas aeruginosa |
|  | | | |

| **Table S2. Comparative Analysis of Pathogen Distribution in Hospital-Acquired, ICU-Acquired, and Community-Acquired Bloodstream Infections Among Critically Ill Patients** | | | | |
| --- | --- | --- | --- | --- |
| Microorganism | HA-BSI  (n=596) | ICUA-BSI  (n=447) | CA-BSI  (n=359) | *P*-value |
| Gram-positive bacteria, n(%) | 148(24.8) | 106(23.7) | 101(28.1) | 0.335 |
| MDRO, n(%) | 38(6.4) | 29(6.5) | 22(6.1) | 0.978 |
| Staphylococcus aureus, n(%) | 43(7.2) | 29(6.5) | 38(10.6) | 0.075 |
| MRSA, n(%) | 26(4.4) | 18(4.0) | 17(4.7) | 0.887 |
| Enterococcus, n(%) | 49(8.2) | 34(7.6) | 15(4.2) | 0.049 |
| VRE, n(%) | 7(1.2) | 5(1.1) | 3(0.8) | 0.879 |
| CNS, n(%) | 33(5.5) | 24(5.4) | 26(7.2) | 0.466 |
| MR-CNS, n(%) | 26(4.4) | 18(4.0) | 17(4.7) | 0.887 |
| Streptococcus, n(%) | 19(3.2) | 18(4.0) | 21(5.8) | 0.134 |
| Gram-negative bacteria, n(%) | 382(64.1) | 297(66.4) | 222(61.8) | 0.396 |
| MDRO, n(%) | 290(48.7) | 238(53.2) | 142(39.6) | ＜0.001 |
| CR-GNB, n(%) | 193(32.4) | 172(38.5) | 61(17.0) | ＜0.001 |
| Klebsiella pneumoniae, n(%) | 105(17.6) | 81(18.1) | 72(20.1) | 0.631 |
| Escherichia coli, n(%) | 69(11.6) | 39(8.7) | 89(24.8) | ＜0.001 |
| Acinetobacter baumannii, n(%) | 101(16.9) | 94(21.0) | 18(5.0) | ＜0.001 |
| Pseudomonas aeruginosa, n(%) | 25(4.2) | 22(4.9) | 11(3.1) | 0.419 |
| Fungus, n(%) | 46(7.7) | 30(6.7) | 28(7.8) | 0.787 |
| Mixed infection, n(%) | 20(3.4) | 14(3.1) | 8(2.2) | 0.600 |
| CA-BSI, Community-acquired bloodstream infection; CNS, Coagulase negative staphylococcus; CR-GNB, Carbapenem resistant gram-negative bacteria; HA-BSI, Hospital-acquired bloodstream infection; ICUA-BSI, Intensive care unit-acquired bloodstream infection; MDRO, Multiple drug resistant organism; MRSA, Methicillin-resistant staphylococcus aureus; MR-CNS, Methicillin-resistant coagulase-negative staphylococcus; VRE, Vancomycin-resistant enterococcus. | | | | |

| **Table S3. Comparison of Demographic and Clinical Characteristics Between Critically Ill Patients With MDRO and Non-MDRO Bloodstream Infections** | | | | |
| --- | --- | --- | --- | --- |
| Characteristics | Total  (n=880) | MDRO  (n=507) | Non-MDRO  (n=373) | P-value |
| Age, Years | 66(52,77) | 65(49,76) | 66(53,78) | 0.249 |
| Male, n(%) | 376(62.3) | 179(70.5) | 197(56.3) | ＜0.001 |
| BMI, kg/m2 | 23.7(21.5,25.7) | 23.7(21.5,26.1) | 23.4(21,25.4) | 0.548 |
| Comorbid conditions |  |  |  |  |
| COPD, n(%) | 40(4.5) | 28(5.5) | 12(3.2) | 0.105 |
| Coronary heart disease, n(%) | 186(21.1) | 96(18.9) | 90(24.1) | 0.062 |
| Hypertension, n(%) | 442(50.2) | 250(49.3) | 192(51.5) | 0.526 |
| Diabetes, n(%) | 251(28.5) | 133(26.2) | 118(31.6) | 0.079 |
| Malignant tumor, n(%) | 137(15.6) | 85(16.8) | 52(13.9) | 0.253 |
| Liver cirrhosis, n(%) | 28(3.2) | 17(3.4) | 11(2.9) | 0.736 |
| Chronic kidney disease, n(%) | 80(9.1) | 43(8.5) | 37(9.9) | 0.463 |
| Hemodialysis, n(%) | 22(2.5) | 9(1.8) | 13(3.5) | 0.108 |
| Severity of illness |  |  |  |  |
| APACHE II | 22(16,28) | 23(17,28) | 21(15,28) | 0.165 |
| SOFA | 11(8,14) | 11(8,14) | 11(7,14) | 0.435 |
| Shock, n(%) | 586(66.6) | 342(67.5) | 244(65.4) | 0.526 |
| Mechanical ventilation, n(%) | 485(55.1) | 299(59.0) | 186(49.9) | 0.007 |
| AKI, n(%) | 331(37.6) | 207(40.8) | 124(33.2) | 0.022 |
| CRRT, n(%) | 163(18.5) | 101(19.9) | 62(16.6) | 0.213 |
| CRBSI, n(%) | 165(18.8) | 87(17.2) | 78(20.9) | 0.159 |
| Risk factors for BSI# |  |  |  |  |
| Gastrointestinal surgery, n(%) | 100(11.4) | 56(11.0) | 44(11.8) | 0.729 |
| Total parenteral nutrition, n(%) | 49(5.6) | 30(5.9) | 19(5.1) | 0.599 |
| Blood transfusion, n(%) | 348(39.5) | 225(44.4) | 123(33.0) | 0.001 |
| Antibiotic exposure, n(%) | 553(62.8) | 352(69.4) | 201(53.9) | ＜0.001 |
| Hospital acquired BSI, n(%) | 550(62.5) | 339(66.9) | 211(56.6) | ＜0.001 |
| ICU acquired BSI, n(%) | 417(47.4) | 275(54.2) | 142(38.1) | ＜0.001 |
| Infection parameter |  |  |  |  |
| WBC, ×109/L | 11.9(7.6,18.1) | 12.1(7.7,18.4) | 11.7(7.5,17.5) | 0.506 |
| CRP, mg/L | 138.4(77,186) | 138.4(77,189) | 138.4(76.8,181.5) | 0.356 |
| PCT, ng/mL | 4.4(0.6,14.8) | 4.3(0.6,15) | 4.6(0.5,14.5) | 0.907 |
| Early appropriate antimicrobial therapy, n(%) | 532(60.5) | 236(46.5) | 296(79.4) | ＜0.001 |
| Length of hospital stay, day | 21(11,36) | 20(11,37) | 22(11,35) | 0.773 |
| Length of ICU stay, day | 12(5,23) | 13(6,26) | 11(5,20) | 0.011 |
| 28-day mortality, n(%) | 243(27.6) | 149(29.4) | 94(25.2) | 0.170 |
| ICU mortality, n(%) | 233(26.5) | 147(29.0) | 86(23.1) | 0.049 |
| #Data on risk factors for bloodstream infection, identified within two weeks prior to the diagnosis of bloodstream infection, were collected.  AKI, Acute kidney injury; APACHE II, Acute Physiology and Chronic Health Evaluation II; BMI, Body mass index; BSI, Bloodstream infection; COPD, Chronic obstructive pulmonary disease; CRBSI, Catheter-related bloodstream infection; CRP, C-reactive protein; CRRT, Continuous renal replacement therapy; ICU, Intensive care unit; MDRO, Multiple Drug Resistant Organism; SOFA, Sequential Organ Failure Assessment; PCT, Procalcitonin; WBC, White blood cell. | | | | |

| **Table S4. Comparative Demographic and Clinical Characteristics of Critically Ill Patients with CR-GNB and CS-GNB Bloodstream Infections** | | | | |
| --- | --- | --- | --- | --- |
| Characteristics | Total  (n=604) | CR-GNB  (n=254) | CS-GNB  (n=350) | P-value |
| Age, Years | 66(52,77) | 65(49,76) | 66(53,78) | 0.249 |
| Male, n(%) | 376(62.3) | 179(70.5) | 197(56.3) | ＜0.001 |
| BMI, kg/m2 | 23.7(21.5,25.7) | 23.7(21.5,26.1) | 23.4(21,25.4) | 0.548 |
| Comorbid conditions |  |  |  |  |
| COPD, n(%) | 20(3.3) | 11(4.3) | 9(2.6) | 0.233 |
| Coronary heart disease, n(%) | 111(18.4) | 41(16.1) | 70(20.0) | 0.227 |
| Hypertension, n(%) | 283(46.9) | 116(45.7) | 167(47.7) | 0.619 |
| Diabetes, n(%) | 160(26.5) | 52(20.5) | 108(30.9) | 0.004 |
| Malignant tumor, n(%) | 94(15.6) | 35(13.8) | 59(16.9) | 0.303 |
| Liver cirrhosis, n(%) | 17(2.8) | 7(2.8) | 10(2.9) | 0.941 |
| Chronic kidney disease, n(%) | 44(7.3) | 17(6.7) | 27(7.7) | 0.634 |
| Hemodialysis, n(%) | 9(1.5) | 4(1.6) | 5(1.4) | 1.000 |
| Severity of illness |  |  |  |  |
| APACHE II | 22(16,28) | 23(17,28) | 21(15,28) | 0.165 |
| SOFA | 11(8,14) | 11(8,14) | 11(7,14) | 0.435 |
| Shock, n(%) | 411(68.0) | 175(68.9) | 236(67.4) | 0.702 |
| Mechanical ventilation, n(%) | 328(54.3) | 177(69.7) | 151(43.1) | ＜0.001 |
| AKI, n(%) | 245(40.6) | 110(43.3) | 135(38.6) | 0.242 |
| CRRT, n(%) | 114(18.9) | 60(23.6) | 54(15.4) | 0.011 |
| CRBSI, n(%) | 94(15.6) | 56(22.0) | 38(10.9) | ＜0.001 |
| Risk factors for BSI# |  |  |  |  |
| Gastrointestinal surgery, n(%) | 77(12.7) | 29(11.4) | 48(13.7) | 0.403 |
| Total parenteral nutrition, n(%) | 28(4.6) | 13(5.1) | 15(4.3) | 0.631 |
| Blood transfusion, n(%) | 257(42.5) | 147(57.9) | 110(31.4) | ＜0.001 |
| Antibiotic exposure, n(%) | 396(65.6) | 206(81.1) | 190(54.3) | ＜0.001 |
| Hospital acquired BSI, n(%) | 382(63.2) | 193(76.0) | 189(54) | ＜0.001 |
| ICU acquired BSI, n(%) | 297(49.2) | 172(67.7) | 125(35.7) | ＜0.001 |
| Infection parameter |  |  |  |  |
| WBC, ×109/L | 12.3(7.4,19) | 11.4(7.1,17.2) | 12.9(7.7,20.1) | 0.028 |
| CRP, mg/L | 138.4(86.3,199.8) | 138.4(86.4,199) | 138.4(85.4,201) | 0.924 |
| PCT, ng/mL | 6.1(0.8,17.5) | 2.9(0.5,10.9) | 10.2(1.3,21.1) | ＜0.001 |
| Early appropriate antimicrobial therapy, n(%) | 360(59.6) | 54(21.3) | 306(87.4) | ＜0.001 |
| Length of hospital stay, day | 20(11,36) | 21(11,38) | 20(9,35) | 0.029 |
| Length of ICU stay, day | 12(5,23) | 16(8,29) | 8(4,19) | ＜0.001 |
| 28-day mortality, n(%) | 168(27.8) | 79(31.1) | 89(25.4) | 0.124 |
| ICU mortality, n(%) | 155(25.7) | 79(31.1) | 76(21.7) | 0.009 |
| #Data on risk factors for bloodstream infection, identified within two weeks prior to the diagnosis of bloodstream infection, were collected.  AKI, Acute kidney injury; APACHE II, Acute Physiology and Chronic Health Evaluation II; BMI, Body mass index; BSI, Bloodstream infection; COPD, Chronic obstructive pulmonary disease; CRBSI, Catheter-related bloodstream infection; CR-GNB, Carbapenem resistant gram-negative bacteria; CRP, C-reactive protein; CRRT, Continuous renal replacement therapy; CS-GNB, Carbapenem sensitive gram-negative bacteria; ICU, Intensive care unit; SOFA, Sequential Organ Failure Assessment; PCT, Procalcitonin; WBC, White blood cell. | | | | |

| **Table S5. Risk Factors Associated with Bloodstream Infections Caused by Carbapenem-Resistant Gram-Negative Bacteria** | | |
| --- | --- | --- |
| Risk factors | Adjusted OR(95%CI) | P value |
| Male | 1.59 (0.99,2.56) | 0.053 |
| Diabetes | 0.79 (0.46,1.34) | 0.379 |
| Severity of illness |  |  |
| APACHE II | 1.02 (0.99,1.04) | 0.294 |
| Mechanical ventilation | 0.81 (0.46,1.43) | 0.464 |
| CRRT | 0.97 (0.52,1.79) | 0.916 |
| CRBSI | 1.81 (0.96,3.39) | 0.065 |
| Risk factors for BSI# |  |  |
| Blood transfusion | 1.52 (0.89,2.59) | 0.129 |
| Antibiotic exposure | 1.82 (1.01,3.28) | 0.044 |
| Hospital acquired BSI | 0.75 (0.36,1.56) | 0.436 |
| ICU acquired BSI | 2.22 (1.04,4.76) | 0.036 |
| Early appropriate antimicrobial therapy | 0.05 (0.03,0.07) | <0.001 |
| #Data on risk factors for bloodstream infection, identified within two weeks prior to the diagnosis of bloodstream infection, were collected.  The variables included in the multivariate analysis were: antibiotic exposure, APACHE II score, blood transfusion, CRBSI, CRRT, diabetes, early appropriate antimicrobial therapy, gender, hospital-acquired BSI, ICU-acquired BSI and mechanical ventilation.  APACHE II, Acute Physiology and Chronic Health Evaluation II; BSI, Bloodstream infection; CRBSI, Catheter-related bloodstream infection; CRRT, Continuous renal replacement therapy; ICU, Intensive care unit. | | |

| **Table S6. Comparison of Demographic and Clinical Characteristics Between ICU Survivors and Non-Survivors Among Patients with Bloodstream Infections** | | | | |
| --- | --- | --- | --- | --- |
| Characteristics | Total  (n=955) | Survivors  (n=699) | Non-Survivors  (n=256) | P-value |
| Age, Years | 65(52,78) | 64(51,75) | 72(59,82) | ＜0.001 |
| Male, n(%) | 616(64.5) | 445(63.7) | 171(66.8) | 0.370 |
| BMI, kg/m2 | 23.7(21.5,25.7) | 24.0(22.0,26.1) | 22.9(20.8,24.5) | ＜0.001 |
| Comorbid conditions |  |  |  |  |
| COPD, n(%) | 42(4.4) | 25(3.6) | 17(6.6) | 0.041 |
| Coronary heart disease, n(%) | 203(21.3) | 137(19.6) | 66(25.8) | 0.039 |
| Hypertension, n(%) | 475(49.7) | 349(49.9) | 126(49.2) | 0.846 |
| Diabetes, n(%) | 269(28.2) | 196(28.0) | 73(28.5) | 0.885 |
| Malignant tumor, n(%) | 153(16.0) | 99(14.2) | 54(21.1) | 0.010 |
| Liver cirrhosis, n(%) | 30(3.1) | 23(3.3) | 7(2.7) | 0.663 |
| Chronic kidney disease, n(%) | 89(9.3) | 61(8.7) | 28(10.9) | 0.298 |
| Hemodialysis, n(%) | 22(2.3) | 16(2.3) | 6(2.3) | 0.960 |
| Severity of illness |  |  |  |  |
| APACHE II | 22(16,28) | 20(16,26) | 26(19,31) | ＜0.001 |
| SOFA | 11(7,14) | 10(7,14) | 11(9,15) | ＜0.001 |
| Shock, n(%) | 639(66.9) | 439(62.8) | 200(78.1) | ＜0.001 |
| Mechanical ventilation, n(%) | 531(55.6) | 363(51.9) | 168(65.6) | ＜0.001 |
| AKI, n(%) | 366(38.3) | 230(32.9) | 136(53.1) | ＜0.001 |
| CRRT, n(%) | 185(19.4) | 115(16.5) | 70(27.3) | ＜0.001 |
| CRBSI, n(%) | 175(18.3) | 140(20.0) | 35(13.7) | 0.024 |
| Risk factors for BSI# |  |  |  |  |
| Gastrointestinal surgery, n(%) | 112(11.7) | 79(11.3) | 33(12.9) | 0.499 |
| Total parenteral nutrition, n(%) | 56(5.9) | 30(4.3) | 26(10.2) | 0.001 |
| Blood transfusion, n(%) | 378(39.6) | 261(37.3) | 117(45.7) | 0.019 |
| Antibiotic exposure, n(%) | 603(63.1) | 407(58.2) | 196(76.6) | ＜0.001 |
| Hospital acquired BSI, n(%) | 596(62.4) | 407(58.2) | 189(73.8) | ＜0.001 |
| ICU acquired BSI, n(%) | 447(46.8) | 299(42.8) | 148(57.8) | ＜0.001 |
| MDRO infection, n(%) | 507(53.1) | 360(51.5) | 147(57.4) | 0.104 |
| CR-GNB infection, n(%) | 265(27.7) | 181(25.9) | 84(32.8) | 0.034 |
| Infection parameter |  |  |  |  |
| WBC, ×109/L | 11.9(7.5,18.1) | 12.6(8.0,18.6) | 10.2(6.2,15.9) | ＜0.001 |
| CRP, mg/L | 138.4(75.6,185.0) | 138.4(76.1,184.9) | 133.5(71.4,185.0) | 0.706 |
| PCT, ng/mL | 4.1(0.6,14.0) | 3.5(0.5,14.1) | 4.8(1.1,14.0) | 0.011 |
| Early appropriate antimicrobial therapy, n(%) | 548(57.4) | 428(61.2) | 120(46.9) | ＜0.001 |
| #Data on risk factors for bloodstream infection, identified within two weeks prior to the diagnosis of bloodstream infection, were collected.  AKI, Acute kidney injury; APACHE II, Acute Physiology and Chronic Health Evaluation II; BMI, Body mass index; BSI, Bloodstream infection; COPD, Chronic obstructive pulmonary disease; CRBSI, Catheter-related bloodstream infection; CR-GNB, Carbapenem resistant gram-negative bacteria; CRP, C-reactive protein; CRRT, Continuous renal replacement therapy; ICU, Intensive care unit; MDRO, Multiple Drug Resistant Organism; SOFA, Sequential Organ Failure Assessment; PCT, Procalcitonin; WBC, White blood cell. | | | | |

| **Table S7. Identifying Risk Factors for ICU Mortality in Critically Ill Patients with Bloodstream Infections** | | |
| --- | --- | --- |
| Risk factors | Adjusted OR(95%CI) | P value |
| Age | 1.02 (1.01,1.03) | <0.001 |
| BMI | 0.93 (0.89,0.97) | <0.001 |
| Comorbid conditions |  |  |
| COPD | 1.05 (0.51,2.16) | 0.894 |
| Coronary heart disease | 1.07 (0.72,1.60) | 0.736 |
| Malignant tumor | 1.38 (0.90,2.11) | 0.140 |
| Severity of illness |  |  |
| APACHE II | 1.05 (1.03,1.08) | <0.001 |
| SOFA | 1.02 (0.98,1.08) | 0.328 |
| Shock | 1.65 (1.11,2.44) | 0.011 |
| Mechanical ventilation | 1.31 (0.88,1.94) | 0.177 |
| AKI | 1.70 (1.19,2.42) | 0.003 |
| CRRT | 1.27 (0.83,1.95) | 0.278 |
| CRBSI | 0.54 (0.34,0.86) | 0.007 |
| Risk factors for BSI# |  |  |
| Total parenteral nutrition | 2.03 (1.09,3.75) | 0.026 |
| Blood transfusion | 0.70 (0.48,1.03) | 0.072 |
| Antibiotic exposure | 1.80 (1.19,2.71) | 0.005 |
| Hospital acquired BSI | 1.22 (0.74,2.01) | 0.439 |
| ICU acquired BSI | 1.70 (1.01,2.87) | 0.043 |
| MDRO infection | 1.01 (0.68,1.50) | 0.970 |
| CR-GNB infection | 0.89 (0.56,1.44) | 0.645 |
| Early appropriate antimicrobial therapy | 0.63 (0.44,0.91) | 0.013 |

#Data on risk factors for bloodstream infection, identified within two weeks prior to the diagnosis of bloodstream infection, were collected.

The variables included in the multivariate analysis were: age, AKI, antibiotic exposure, APACHE II score, blood transfusion, BMI, COPD, Coronary heart disease, CRBSI, CR-GNB infection, CRRT, early appropriate antimicrobial therapy, hospital-acquired BSI, ICU-acquired BSI, malignant tumor, MDRO infection, mechanical ventilation, shock, SOFA score and total parenteral nutrition.

AKI, Acute kidney injury; APACHE II, Acute Physiology and Chronic Health Evaluation II; BMI, Body mass index; BSI, Bloodstream infection; COPD, Chronic obstructive pulmonary disease; CRBSI, Catheter-related bloodstream infection; CR-GNB, Carbapenem resistant gram-negative bacteria; CRRT, Continuous renal replacement therapy; ICU, Intensive care unit; MDRO, Multiple Drug Resistant Organism; SOFA, Sequential Organ Failure Assessment

**Figure S1:** Proportion of missing data


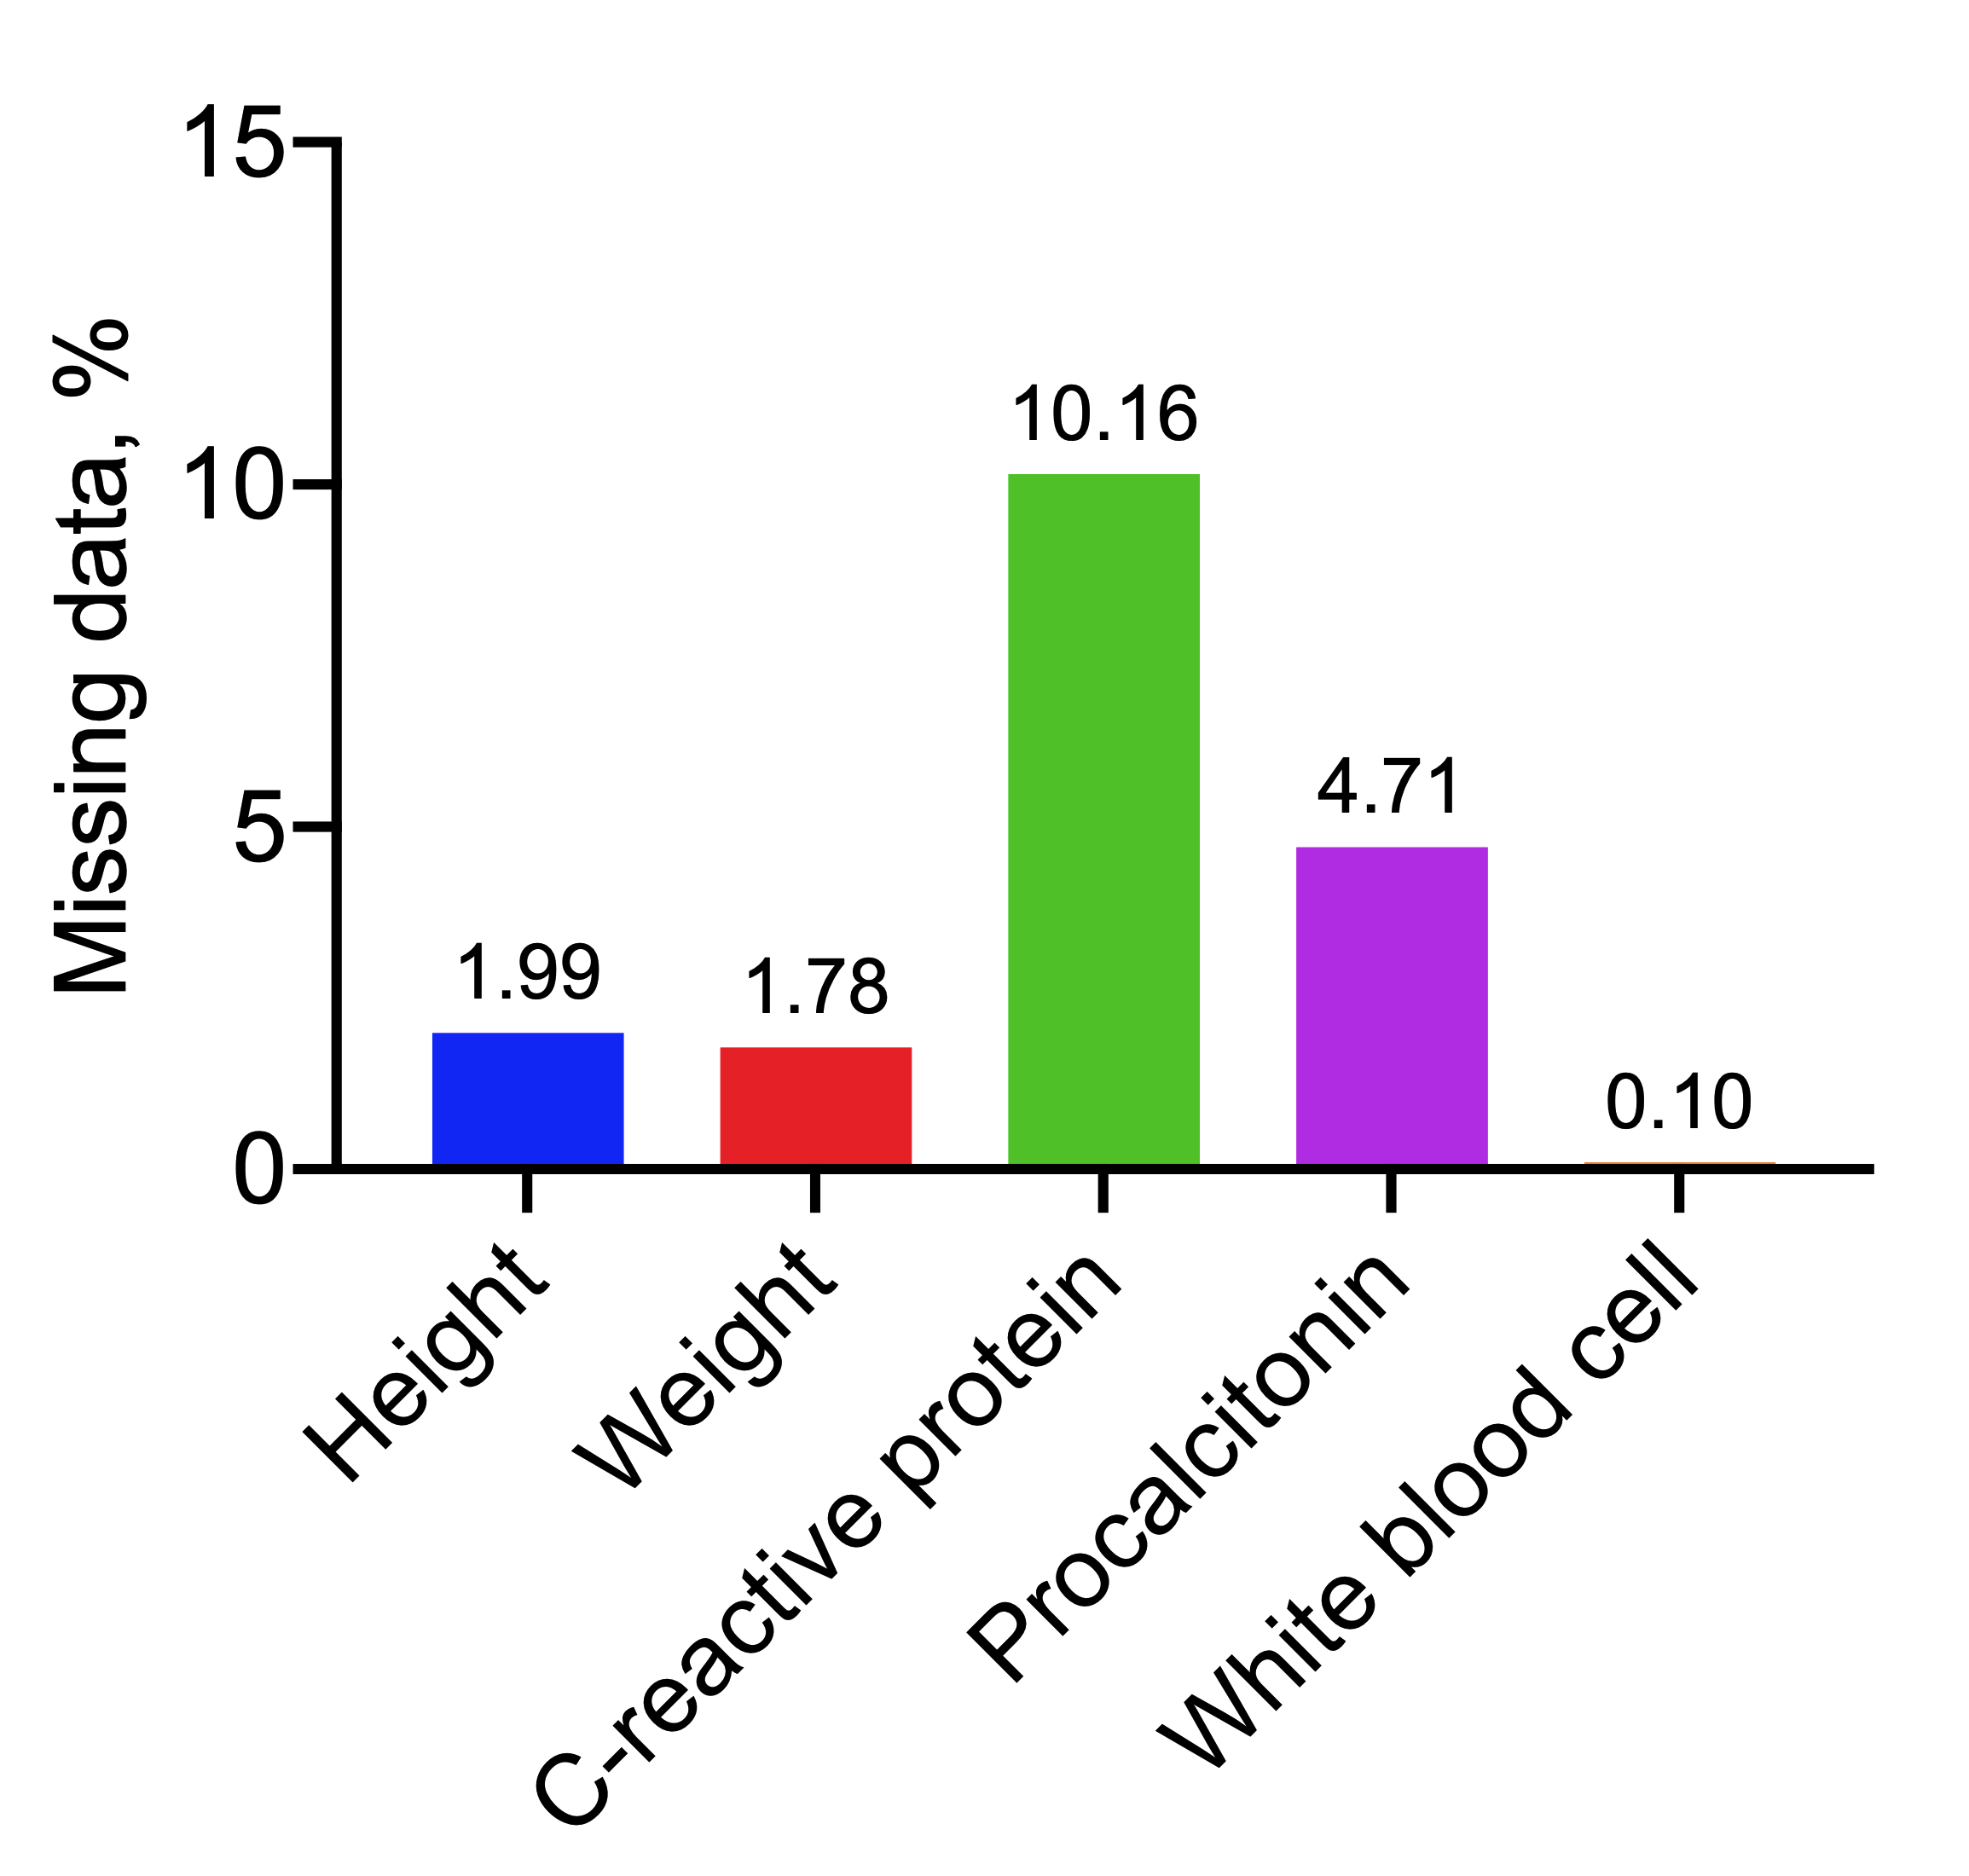


**Figure S2:** Patient Inclusion Flowchart


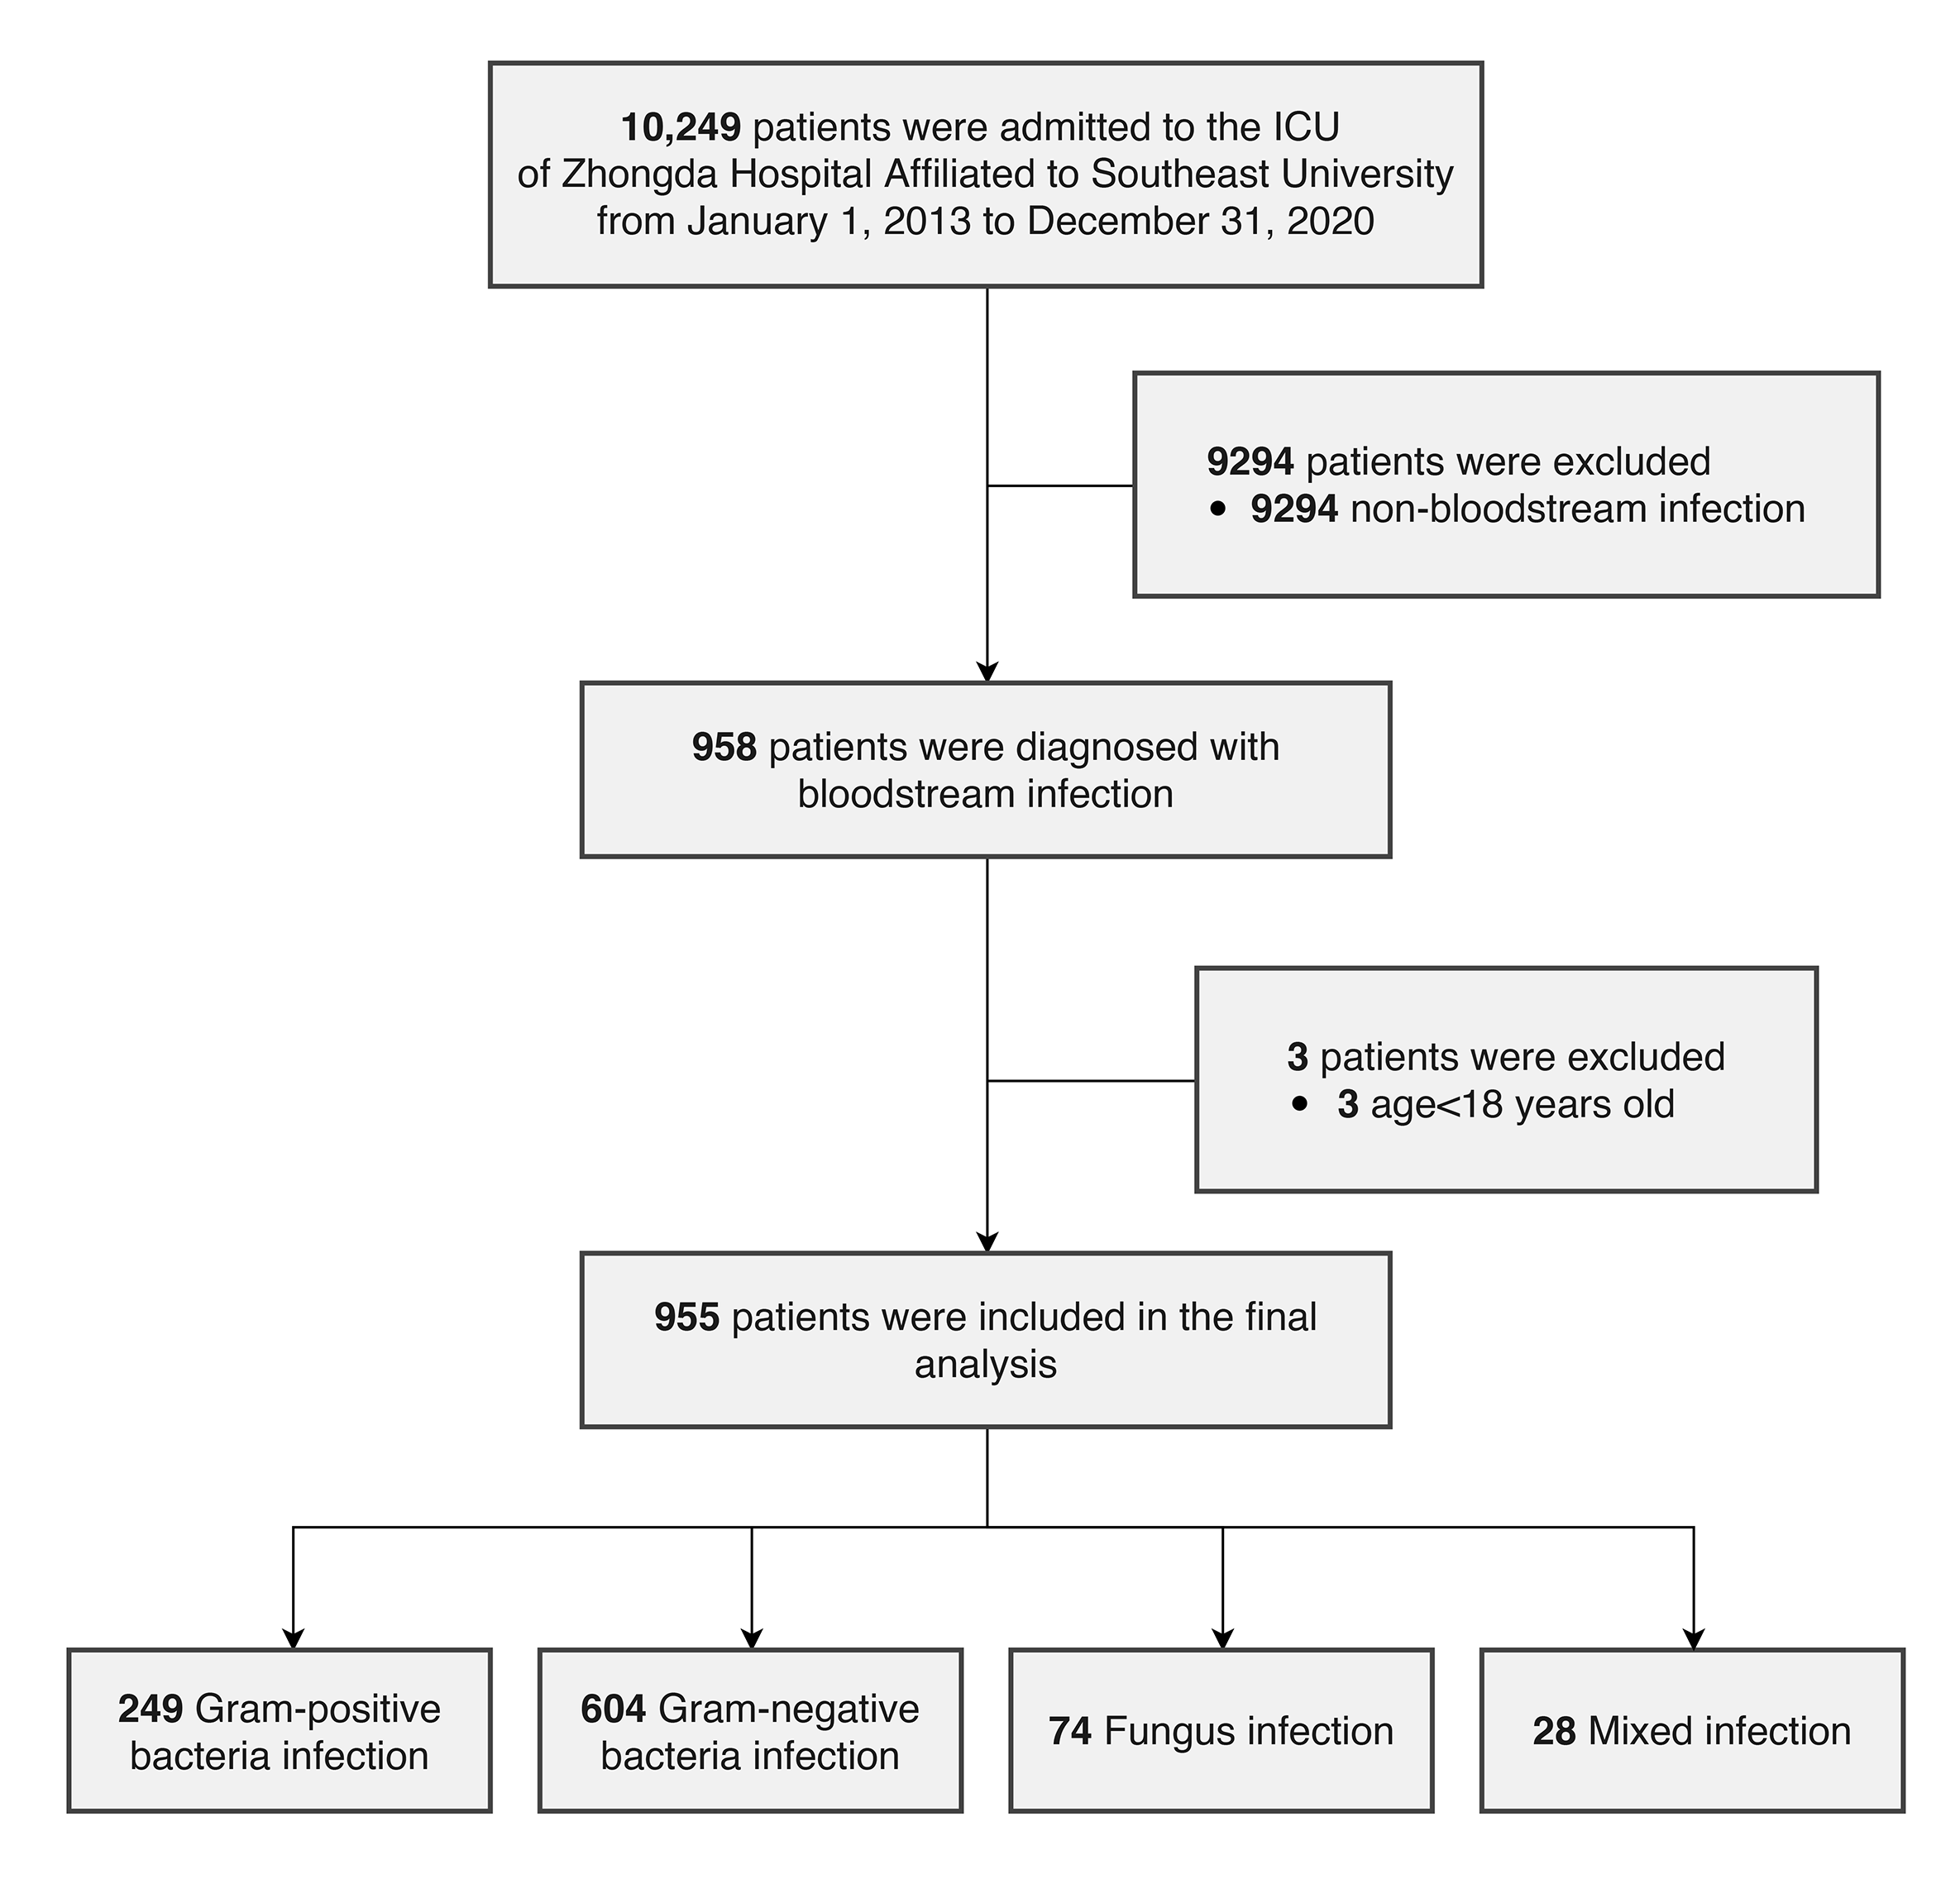


ICU, Intensive Care Unit
